# Supplementary material for: Abscopal Activation of Microglia in Embryonic Fish Brain Following Targeted Irradiation with Heavy-Ion Microbeam
Source: PubMed Central journal article supplement (PMC5535919; doi:10.3390/ijms18071428), 2017-07-04
Supplement: ijms-18-01428-s001.pdf [file ijms-18-01428-s001.pdf]

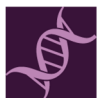

# Abscopal Activation of Microglia in Embryonic Fish Brain following Targeted Irradiation with Heavy-Ion Microbeam

Takako Yasuda, Miyuki Kamahori, Kento Nagata, Tomomi Watanabe-Asaka, Michiyo Suzuki, Tomoo Funayama, Hiroshi Mitani and Shoji Oda

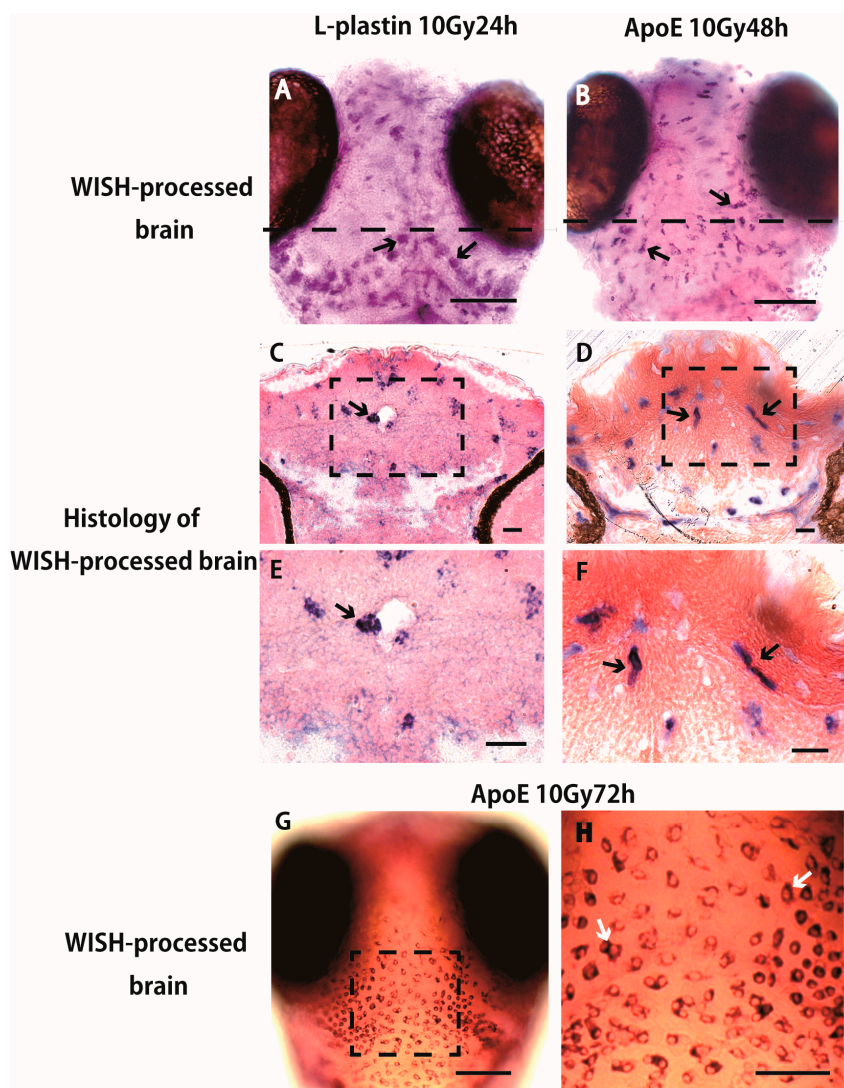

**Figure S1.** The morphology of microglia during 3 days after  $\gamma$ -ray irradiation. The distribution of L-plastin mRNA 24 h after the irradiation (A) and ApoE mRNA 48 h after the irradiation (B) were revealed by WISH. In a histological section of the WISH-processed brain prepared at the dotted line in A, L-plastin expressing microglia showed the phagocytic morphology (arrows in C and E). A magnified image of the microglia with the phagocytic morphology in the area squared with dotted line in C is showed in E. In a histological section of the WISH-processed brain prepared at the dotted line in B, ApoE expressing microglia showed migrating morphology (arrows in D and F). A magnified image of the microglia with the migrating morphology of microglia in the area squared with dotted line in D is showed in F. ApoE-expressing microglia accumulated at the dorsal surface of the brain and maintained a rounded “amoeboid” morphology even 72 h after the irradiation (G, arrows in H). A magnified image of the “amoeboid” microglia in the area squared with dotted line in G is showed in H. Scale bars = 100  $\mu$ m in A, B and G; = 20  $\mu$ m in C- F and H.
